# Supplementary material for: Dynamics of the chili pepper transcriptome during fruit development
Source: PubMed Central journal article supplement (PMC3936869; doi:10.1186/1471-2164-15-143), 2014-02-21
Supplement: 1471-2164-15-143-S5.pdf [file 1471-2164-15-143-S5.pdf]

| Unigene ID               | Putative Function                   | Orientation | Start | Primer Length | Tm   | GC%  | Sequences 5'-3'      | Product Size |
|--------------------------|-------------------------------------|-------------|-------|---------------|------|------|----------------------|--------------|
| <b>comp30344_c0_seq1</b> | Geranyl-diphosphate synthase        | FORWARD     | 482   | 20            | 60   | 60   | CGTAGCTTCTCCACCTCGAC | 85           |
| <b>comp30344_c0_seq2</b> |                                     | REVERSE     | 556   | 20            | 60   | 50   | ACAAAACGGCAGCTCTCCTA |              |
| <b>comp27538_c0_seq1</b> | Beta-carotene hydrolase             | FORWARD     | 753   | 20            | 60.2 | 55   | GCATATGCACGAGTCACACC | 129          |
| <b>comp27538_c0_seq2</b> |                                     | REVERSE     | 881   | 20            | 60.2 | 50   | GGGATGAGGCCTTTATGGTT |              |
| <b>comp9344_c0_seq1</b>  | Capsanthin/capsorubin synthase      | FORWARD     | 600   | 20            | 60.1 | 50   | TCTATCCGAAGGCCACAAAC | 200          |
| <b>comp9344_c0_seq1</b>  |                                     | REVERSE     | 799   | 18            | 60.2 |      | CGCGGATTCCTCAAATG    |              |
| <b>comp25714_c0_seq2</b> | Zeta-carotene dehydrogenase         | FORWARD     | 1388  | 20            | 60.1 | 50   | ATGTATGTTAGCGGGCTTGC | 128          |
| <b>comp25714_c0_seq2</b> |                                     | REVERSE     | 1515  | 20            | 60   | 50   | TCCAATTCCTCCACTTCTG  |              |
| <b>comp32924_c0_seq1</b> | Phytoene desaturase                 | FORWARD     | 234   | 20            | 60.2 |      | TGATTATCCAAGGCCAGAGC | 139          |
| <b>comp32924_c0_seq2</b> |                                     | REVERSE     | 372   | 20            | 59.9 |      | AGACAAACCACCCAAACCTG |              |
| <b>comp22555_c0_seq1</b> | Phytoene synthase                   | FORWARD     | 41    | 20            | 60   | 50   | TCTCAAACGGGACAGGATTC | 122          |
| <b>comp22555_c0_seq1</b> |                                     | REVERSE     | 162   | 20            | 59.4 | 50   | CCACCTTTGTTTTCCACCTC |              |
| <b>comp18026_c0_seq2</b> | Zeaxanthin epoxidase                | FORWARD     | 1249  | 20            | 60.4 | 50   | TATTTGGGGGATGGTGTGAC | 163          |
| <b>comp18026_c0_seq2</b> |                                     | REVERSE     | 1411  | 20            | 60   | 50   | CCCAAATTAGGCTGCATAGC |              |
| <b>comp19500_c0_seq1</b> | Isopentenyl pyrophosphate isomerase | FORWARD     | 469   | 20            | 59.6 | 50   | CTTCAGCAACGATCAGCAAC | 71           |
| <b>comp19500_c0_seq2</b> |                                     | REVERSE     | 539   | 19            | 59.8 | 52.6 | AGTGGATGGCTGCAACAAG  |              |
| <b>comp26908_c1_seq5</b> | Lycopene cyclase                    | FORWARD     | 1184  | 20            | 60.3 | 50   | AGTTATCCGCAGCTGTTTGG | 160          |
| <b>comp26908_c1_seq5</b> |                                     | REVERSE     | 1343  | 20            | 60.3 | 50   | CCATGCCAATAACGAGGTTC |              |
